# Supplementary material for: Temporal trends in diabetic ketoacidosis at diagnosis of paediatric type 1 diabetes between 2006 and 2016: results from 13 countries in three continents
Source: Springer Nature journal article supplement (doi:10.1007/s00125-020-05152-1), 2020-05-08
Supplement: MOESM1 [file 17964846]

**ESM Table 1. Characteristics of participants**

|                        | Type 1 diabetes cases (n) | Gender (M) (%) | Age at onset median (IQR) | Minority Status % | DKA cases % | DKA cases identified by |                              |                               |                                    |
|------------------------|---------------------------|----------------|---------------------------|-------------------|-------------|-------------------------|------------------------------|-------------------------------|------------------------------------|
|                        |                           |                |                           |                   |             | pH only n (%)           | serum bicarbonate only n (%) | pH or serum bicarbonate n (%) | physician documentation only n (%) |
| Australia (ADDN)       | 4428                      | 51.1           | 8.3 (5.2-11.1)            | 29.0              | 24.9        | 0                       | 0                            | 0                             | 1101 (100)                         |
| Austria                | 1504                      | 55.7           | 8.6 (4.9-11.6)            | 21.4              | 38.0        | 239 (41.8)              | 2 (0.35)                     | 327 (57.2)                    | 4 (0.7)                            |
| Czechia                | 2261                      | 53.3           | 8.1 (4.9-11.1)            | -                 | 28.7        | 651 (100)               | 0                            | 0                             | 0                                  |
| Denmark                | 3084                      | 52.0           | 9.7 (6.4-12.3)            | 8.1               | 21.6        | 15 (2.4)                | 621 (97.5)                   | 1 (0.2)                       | 0                                  |
| Germany                | 19127                     | 53.0           | 9.0 (5.6-11.9)            | 14.6              | 26.8        | 2890 (56.4)             | 64 (1.25)                    | 1962 (38.3)                   | 209 (4.1)                          |
| Italy                  | 10317                     | 53.2           | 8.0 (5.0-11.0)            | 7.7               | 41.2        | 3280 (77.2)             | 0                            | 970 (22.82)                   | 0                                  |
| Luxembourg             | 192                       | 59.4           | 8.9 (5.8-12.2)            | 26.6              | 43.8        | 0                       | 3 (3.6)                      | 81 (964)                      | 0                                  |
| New Zealand (Auckland) | 670                       | 51.2           | 9.5 (6.1-12.1)            | 24.6              | 26.3        | 1 (0.57)                | 0                            | 175 (99.4)                    | 0                                  |
| Norway                 | 3331                      | 54.2           | 9.3 (5.9-12.1)            | 6.8               | 22.1        | 42 (5.7)                | 1 (0.1)                      | 692 (94.2)                    | 0                                  |
| Slovenia               | 471                       | 52.4           | 8.1 (4.5-11.2)            | -                 | 40.3        | 0                       | 0                            | 190 (100)                     | 0                                  |
| Sweden                 | 6457                      | 53.4           | 9.0 (5.4-11.9)            | 2.6               | 19.5        | 201 (15.9)              | 4 (0.3)                      | 1056 (83.7)                   | 0                                  |
| USA (SEARCH)           | 5485                      | 52.4           | 9.4 (5.9-11.9)            | 33.4              | 36.8        | 71 (3.5)                | 259 (12.8)                   | 1034 (51.2)                   | 657 (32.5)                         |
| Wales                  | 1673                      | 50.5           | 9.5 (6.1-12.1)            | 4.9               | 25.5        | 0                       | 0                            | 0                             | 419 (100)                          |
| All countries combined | 59000                     | 52.9           | 9.0 (5.5-11.7)            | 13.0              | 29.2        | 7390 (42.9)             | 954 (5.5)                    | 6488 (37.7)                   | 2390 (13.9)                        |

**ESM Table 2. Prevalence of DKA according to the degree of acidosis for each country and year**

| <i>Moderate DKA</i> |            | Austria     | Czechia     | Denmark     | Germany     | Italy       | Luxembourg  | New Zealand (Auckland) | Norway      | Slovenia    | Sweden     | USA (SEARCH) | All countries combined |
|---------------------|------------|-------------|-------------|-------------|-------------|-------------|-------------|------------------------|-------------|-------------|------------|--------------|------------------------|
| 2006                | n          | 82          |             | 267         | 1509        | 806         |             | 71                     | 261         | 45          | 647        |              | 3688                   |
|                     | Prevalence | 32.9        |             | 10.1        | 16.6        | 24.7        |             | 11.3                   | 9.6         | 24.4        | 10.5       |              | 16.7                   |
|                     | 95% CI     | 22.5 - 43.3 |             | 6.5 - 13.8  | 14.7 - 18.4 | 21.7 - 27.7 |             | 3.7 - 18.8             | 6 - 13.2    | 11.4 - 37.5 | 8.1 - 12.9 |              | 15.5 - 17.9            |
| 2007                | n          | 93          | 144         | 261         | 1682        | 801         | 22          | 60                     | 282         | 43          | 585        |              | 3973                   |
|                     | Prevalence | 24.7        | 22.2        | 12.3        | 16.6        | 22.8        | 18.2        | 11.7                   | 9.6         | 25.6        | 8.4        |              | 16.3                   |
|                     | 95% CI     | 15.8 - 33.7 | 15.4 - 29.1 | 8.3 - 16.3  | 14.8 - 18.4 | 19.9 - 25.8 | 0.7 - 35.7  | 3.3 - 20               | 6.1 - 13    | 12 - 39.2   | 6.1 - 10.6 |              | 15.1 - 17.4            |
| 2008                | n          | 105         | 157         | 264         | 1700        | 880         | 11          | 57                     | 297         | 26          | 548        |              | 4045                   |
|                     | Prevalence | 15.2        | 12.7        | 13.3        | 18.6        | 23.2        | 36.4        | 12.3                   | 14.8        | 3.8         | 9.1        |              | 17.3                   |
|                     | 95% CI     | 8.2 - 22.2  | 7.5 - 18    | 9.1 - 17.4  | 16.8 - 20.5 | 20.4 - 26   | 2.5 - 70.3  | 3.5 - 21.1             | 10.8 - 18.9 | 0 - 11.8    | 6.7 - 11.5 |              | 16.1 - 18.4            |
| 2009                | n          | 114         | 169         | 284         | 1668        | 1047        | 15          | 60                     | 323         | 26          | 622        | 849          | 5177                   |
|                     | Prevalence | 24.6        | 16.6        | 10.6        | 16.8        | 23.5        | 6.7         | 21.7                   | 11.1        | 26.9        | 9.3        | 10.1         | 15.7                   |
|                     | 95% CI     | 16.5 - 32.6 | 10.9 - 22.2 | 7 - 14.2    | 15 - 18.6   | 20.9 - 26.1 | 0 - 21      | 10.9 - 32.4            | 7.7 - 14.6  | 8.7 - 45.2  | 7 - 11.6   | 8.1 - 12.2   | 14.7 - 16.7            |
| 2010                | n          | 107         | 207         | 294         | 1520        | 945         | 14          | 55                     | 293         | 42          | 560        | 677          | 4714                   |
|                     | Prevalence | 19.6        | 18.8        | 14.3        | 11.7        | 24.7        | 35.7        | 12.7                   | 11.6        | 9.5         | 10.0       | 14.3         | 15.2                   |
|                     | 95% CI     | 12 - 27.3   | 13.5 - 24.2 | 10.3 - 18.3 | 10.1 - 13.3 | 21.9 - 27.4 | 7 - 64.4    | 3.6 - 21.8             | 7.9 - 15.3  | 0.3 - 18.8  | 7.5 - 12.5 | 11.7 - 17    | 14.2 - 16.2            |
| 2011                | n          | 155         | 250         | 277         | 1637        | 1048        | 17          | 56                     | 291         | 43          | 593        | 793          | 5160                   |
|                     | Prevalence | 20.6        | 16.8        | 10.5        | 15.1        | 25.5        | 17.6        | 8.9                    | 11.3        | 20.9        | 8.8        | 13.2         | 16.0                   |
|                     | 95% CI     | 14.2 - 27.1 | 12.1 - 21.5 | 6.8 - 14.1  | 13.4 - 16.8 | 22.8 - 28.1 | 0 - 37.9    | 1.2 - 16.6             | 7.7 - 15    | 8.3 - 33.6  | 6.5 - 11.1 | 10.9 - 15.6  | 15 - 17                |
| 2012                | n          | 188         | 268         | 251         | 1913        | 1011        | 17          | 55                     | 291         | 44          | 582        | 802          | 5422                   |
|                     | Prevalence | 23.9        | 11.6        | 8.0         | 16.0        | 24.0        | 29.4        | 16.4                   | 17.2        | 43.2        | 10.7       | 19.0         | 17.4                   |
|                     | 95% CI     | 17.8 - 30.1 | 7.7 - 15.4  | 4.6 - 11.3  | 14.4 - 17.7 | 21.4 - 26.7 | 5.3 - 53.6  | 6.3 - 26.5             | 12.8 - 21.5 | 27.9 - 58.4 | 8.1 - 13.2 | 16.2 - 21.7  | 16.4 - 18.4            |
| 2013                | n          | 149         | 267         | 302         | 1858        | 1026        | 22          | 60                     | 317         | 50          | 581        | 850          | 5482                   |
|                     | Prevalence | 24.8        | 13.9        | 9.6         | 17.5        | 26.1        | 31.8        | 15.0                   | 14.8        | 28.0        | 10.2       | 16.7         | 17.8                   |
|                     | 95% CI     | 17.8 - 9.7  | 9.7 - 18    | 6.3 - 12.9  | 15.8 - 19.2 | 23.4 - 28.8 | 10.7 - 53   | 5.7 - 24.3             | 10.9 - 18.8 | 15.1 - 40.9 | 7.7 - 12.6 | 14.2 - 19.2  | 16.8 - 18.8            |
| 2014                | n          | 188         | 231         | 296         | 1851        | 915         | 24          | 56                     | 316         | 48          | 615        | 857          | 5397                   |
|                     | Prevalence | 28.2        | 18.6        | 12.2        | 20.1        | 22.4        | 33.3        | 17.9                   | 12.0        | 39.6        | 9.1        | 18.7         | 18.5                   |
|                     | 95% CI     | 21.7 - 13.6 | 13.6 - 23.7 | 8.4 - 15.9  | 18.3 - 21.9 | 19.7 - 25.1 | 13 - 53.7   | 7.5 - 28.2             | 8.4 - 15.6  | 25.2 - 53.9 | 6.8 - 11.4 | 16.1 - 21.3  | 17.5 - 19.6            |
| 2015                | n          | 159         | 290         | 298         | 1857        | 878         | 21          | 74                     | 339         | 42          | 589        |              | 4547                   |
|                     | Prevalence | 29.6        | 17.2        | 14.8        | 20.1        | 23.0        | 23.8        | 16.2                   | 14.2        | 19.0        | 8.1        |              | 18.4                   |
|                     | 95% CI     | 22.4 - 12.9 | 12.9 - 21.6 | 10.7 - 18.8 | 18.3 - 21.9 | 20.2 - 25.8 | 3.9 - 43.7  | 7.6 - 24.8             | 10.4 - 17.9 | 6.7 - 31.4  | 5.9 - 10.4 |              | 17.3 - 19.5            |
| 2016                | n          | 164         | 278         | 290         | 1932        | 960         | 29          | 66                     | 321         | 62          | 535        |              | 4637                   |
|                     | Prevalence | 23.8        | 16.2        | 14.8        | 20.1        | 24.2        | 37.9        | 10.6                   | 10.6        | 32.3        | 13.1       |              | 19.2                   |
|                     | 95% CI     | 17.2 - 11.8 | 11.8 - 20.5 | 10.7 - 18.9 | 18.3 - 21.9 | 21.5 - 26.9 | 19.1 - 56.7 | 3 - 18.2               | 7.2 - 14    | 20.3 - 44.2 | 10.2 - 16  |              | 18 - 20.3              |
| <i>APC</i>          | 1.5        | -0.9        | 1.8         | 2.3         | 0.03        | 6.5         | 1.4         | 1.9                    | 5.2         | 1.1         | 11.1       | 1.8          |                        |
| <i>p</i>            | 0.349      | 0.642       | 0.25        | <0.001      | 0.955       | 0.125       | 0.635       | 0.199                  | 0.039       | 0.344       | <0.001     | <0.001       |                        |

**ESM Table 2. Prevalence of DKA according to the degree of acidosis for each country and year (continue)**

| <b>Severe DKA</b> |            | Austria     | Czechia    | Denmark   | Germany     | Italy       | Luxembourg | New Zealand (Auckland) | Norway     | Slovenia   | Sweden    | USA (SEARCH) | All countries combined |
|-------------------|------------|-------------|------------|-----------|-------------|-------------|------------|------------------------|------------|------------|-----------|--------------|------------------------|
| 2006              | n          | 82          | 0          | 241       | 1509        | 806         |            | 71                     | 261        | 45         | 647       |              | 3688                   |
|                   | Prevalence | 25.6        | 0.0        | 0.8       | 12.3        | 9.9         |            | 4.2                    | 5.0        | 17.8       | 4.8       |              | 9.3                    |
|                   | 95% CI     | 16 - 35.3   | 0 - 0      | 0 - 2     | 10.7 - 14   | 7.9 - 12    |            | 0 - 9.0                | 2.3 - 7.6  | 6.2 - 29.4 | 3.1 - 6.4 |              | 8.4 - 10.3             |
| 2007              | n          | 93          | 144        | 246       | 1682        | 801         | 22         | 60                     | 282        | 43         | 585       |              | 3973                   |
|                   | Prevalence | 18.3        | 14.6       | 3.3       | 12.0        | 11.2        | 13.6       | 3.3                    | 3.5        | 14.0       | 5.3       |              | 9.8                    |
|                   | 95% CI     | 10.3 - 26.3 | 8.7 - 20.4 | 1 - 5.5   | 10.4 - 13.5 | 9 - 13.4    | 0 - 29.2   | 0 - 8.0                | 1.4 - 5.7  | 3.2 - 24.7 | 3.5 - 7.1 |              | 8.9 - 10.7             |
| 2008              | n          | 105         | 157        | 249       | 1700        | 880         | 11         | 57                     | 297        | 26         | 548       |              | 4045                   |
|                   | Prevalence | 11.4        | 8.3        | 1.6       | 14.3        | 10.7        | 0.0        | 1.8                    | 8.1        | 3.8        | 3.8       |              | 10.2                   |
|                   | 95% CI     | 5.2 - 17.6  | 3.9 - 12.6 | 0 - 3.2   | 12.6 - 16   | 8.6 - 12.7  |            | 0 - 5.3                | 5 - 11.2   | 0 - 11.8   | 2.2 - 5.4 |              | 9.3 - 11.1             |
| 2009              | n          | 114         | 169        | 268       | 1668        | 1047        | 15         | 60                     | 323        | 26         | 622       | 849          | 5177                   |
|                   | Prevalence | 15.8        | 7.7        | 2.2       | 10.9        | 11.3        | 6.7        | 8.3                    | 5.9        | 23.1       | 4.7       | 1.3          | 7.9                    |
|                   | 95% CI     | 9 - 22.6    | 3.6 - 11.8 | 0.5 - 4   | 9.4 - 12.4  | 9.4 - 13.2  | 0 - 21     | 1.1 - 15.5             | 3.3 - 8.5  | 5.7 - 40.4 | 3 - 6.3   | 0.5 - 2.1    | 7.1 - 8.6              |
| 2010              | n          | 107         | 207        | 286       | 1520        | 945         | 14         | 55                     | 293        | 42         | 560       | 677          | 4714                   |
|                   | Prevalence | 13.1        | 9.7        | 3.8       | 8.4         | 13.3        | 21.4       | 10.9                   | 4.8        | 2.4        | 5.5       | 2.4          | 7.8                    |
|                   | 95% CI     | 6.6 - 19.6  | 5.6 - 13.7 | 1.6 - 6.1 | 7 - 9.7     | 11.2 - 15.5 | 0 - 46     | 2.4 - 19.4             | 2.3 - 7.2  | 0 - 7.2    | 3.6 - 7.4 | 1.2 - 3.5    | 7.1 - 8.6              |
| 2011              | n          | 155         | 250        | 266       | 1637        | 1048        | 17         | 56                     | 291        | 43         | 593       | 793          | 5160                   |
|                   | Prevalence | 11.6        | 4.8        | 3.4       | 10.5        | 12.2        | 5.9        | 7.1                    | 5.5        | 11.6       | 3.9       | 2.0          | 7.8                    |
|                   | 95% CI     | 6.5 - 16.7  | 2.1 - 7.5  | 1.2 - 5.6 | 9 - 12      | 10.2 - 14.2 | 0 - 18.4   | 0.2 - 14.1             | 2.9 - 8.1  | 1.6 - 21.6 | 2.3 - 5.4 | 1 - 3        | 7.1 - 8.6              |
| 2012              | n          | 188         | 268        | 240       | 1913        | 1011        | 17         | 55                     | 291        | 44         | 582       | 802          | 5422                   |
|                   | Prevalence | 12.8        | 5.2        | 0.8       | 11.1        | 11.3        | 17.6       | 5.5                    | 8.2        | 22.7       | 4.6       | 4.9          | 8.7                    |
|                   | 95% CI     | 8 - 17.6    | 2.5 - 7.9  | 0 - 2     | 9.7 - 12.5  | 9.3 - 13.2  | 0 - 37.9   | 0 - 11.7               | 5.1 - 11.4 | 9.8 - 35.6 | 2.9 - 6.4 | 3.4 - 6.4    | 8 - 9.5                |
| 2013              | n          | 149         | 267        | 297       | 1858        | 1026        | 22         | 60                     | 317        | 50         | 581       | 850          | 5482                   |
|                   | Prevalence | 13.4        | 8.2        | 0.0       | 11.9        | 12.0        | 27.3       | 13.3                   | 9.5        | 6.0        | 3.8       | 3.5          | 8.9                    |
|                   | 95% CI     | 7.9 - 4.9   | 4.9 - 11.6 |           | 10.5 - 13.4 | 10 - 14     | 7.1 - 47.5 | 4.5 - 22.2             | 6.2 - 12.7 | 0 - 12.8   | 2.2 - 5.3 | 2.3 - 4.8    | 8.1 - 9.6              |
| 2014              | n          | 188         | 231        | 284       | 1851        | 915         | 24         | 56                     | 316        | 48         | 615       | 857          | 5397                   |
|                   | Prevalence | 17.0        | 8.2        | 1.8       | 13.5        | 12.7        | 20.8       | 5.4                    | 5.4        | 16.7       | 5.0       | 4.1          | 9.6                    |
|                   | 95% CI     | 11.6 - 4.7  | 4.7 - 11.8 | 0.2 - 3.3 | 11.9 - 15   | 10.5 - 14.8 | 3.3 - 38.4 | 0 - 11.4               | 2.9 - 7.9  | 5.7 - 27.6 | 3.3 - 6.8 | 2.8 - 5.4    | 8.8 - 10.4             |
| 2015              | n          | 159         | 290        | 290       | 1857        | 878         | 21         | 74                     | 339        | 42         | 589       |              | 4547                   |
|                   | Prevalence | 16.4        | 9.3        | 2.1       | 14.2        | 12.2        | 23.8       | 10.8                   | 6.2        | 9.5        | 3.7       |              | 10.8                   |
|                   | 95% CI     | 10.5 - 5.9  | 5.9 - 12.7 | 0.4 - 3.7 | 12.6 - 15.8 | 10 - 14.4   | 3.9 - 43.7 | 3.6 - 18.1             | 3.6 - 8.8  | 0.3 - 18.8 | 2.2 - 5.3 |              | 9.9 - 11.7             |
| 2016              | n          | 164         | 278        | 278       | 1932        | 960         |            | 66                     | 321        | 62         | 535       |              | 4637                   |
|                   | Prevalence | 23.8        | 7.9        | 3.6       | 13.8        | 12.6        |            | 6.1                    | 4.4        | 14.5       | 6.2       |              | 11.2                   |
|                   | 95% CI     | 17.2 - 4.7  | 4.7 - 11.1 | 1.4 - 5.8 | 12.3 - 15.4 | 10.5 - 14.7 |            | 0.1 - 12               | 2.1 - 6.6  | 5.5 - 23.5 | 4.1 - 8.2 |              | 10.3 - 12.1            |
| APC               |            | -1.0        | -2.5       | 1.1       | 1.5         | 1.7         | 1.7        | 7.4                    | 1.3        | -0.7       | 0.2       | 21.7         | 1.6                    |
| p                 |            | 0.639       | 0.327      | 0.784     | 0.014       | 0.054       | 0.007      | 0.100                  | 0.56       | 0.848      | 0.929     | <0.001       | <0.001                 |

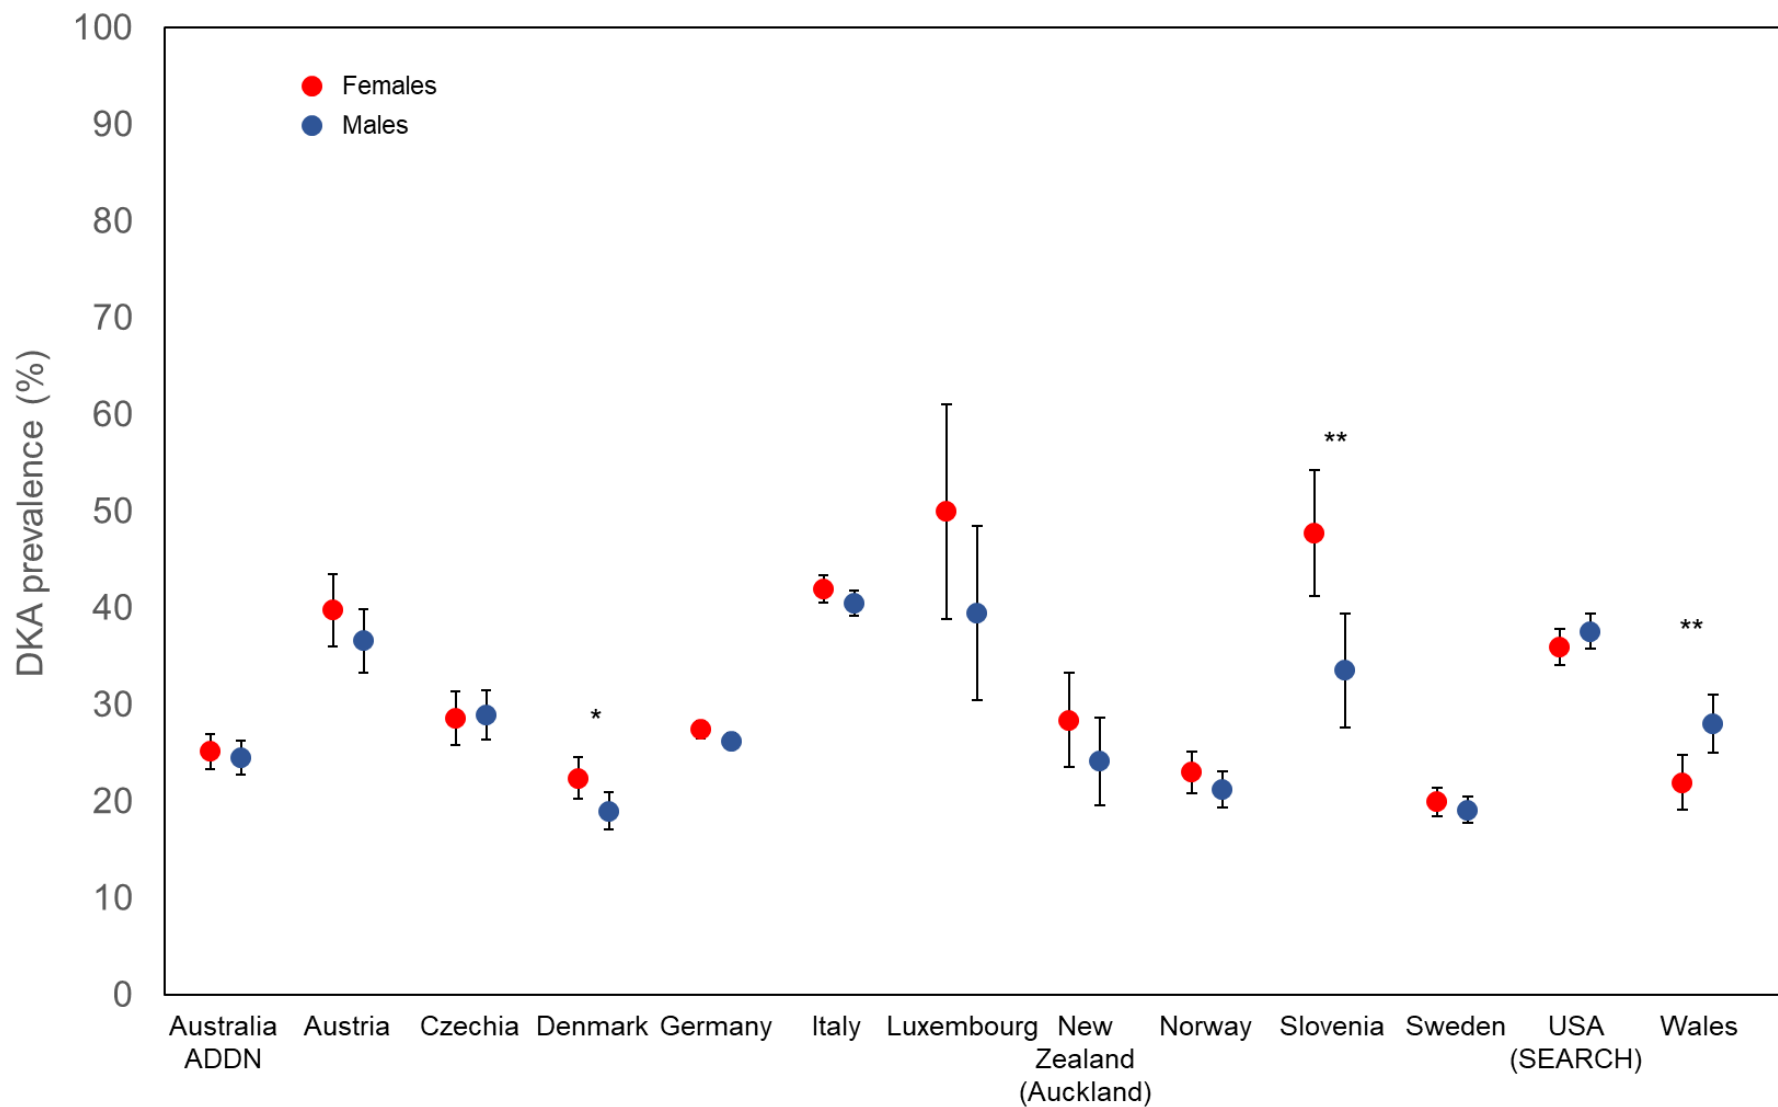

Chi-square test, \*  $p < 0.05$ ; \*\*  $p \leq 0.01$

**ESM Figure 1. Average DKA prevalence (per 100 people) at diagnosis of type 1 diabetes and 95%CI across study population, by sex**

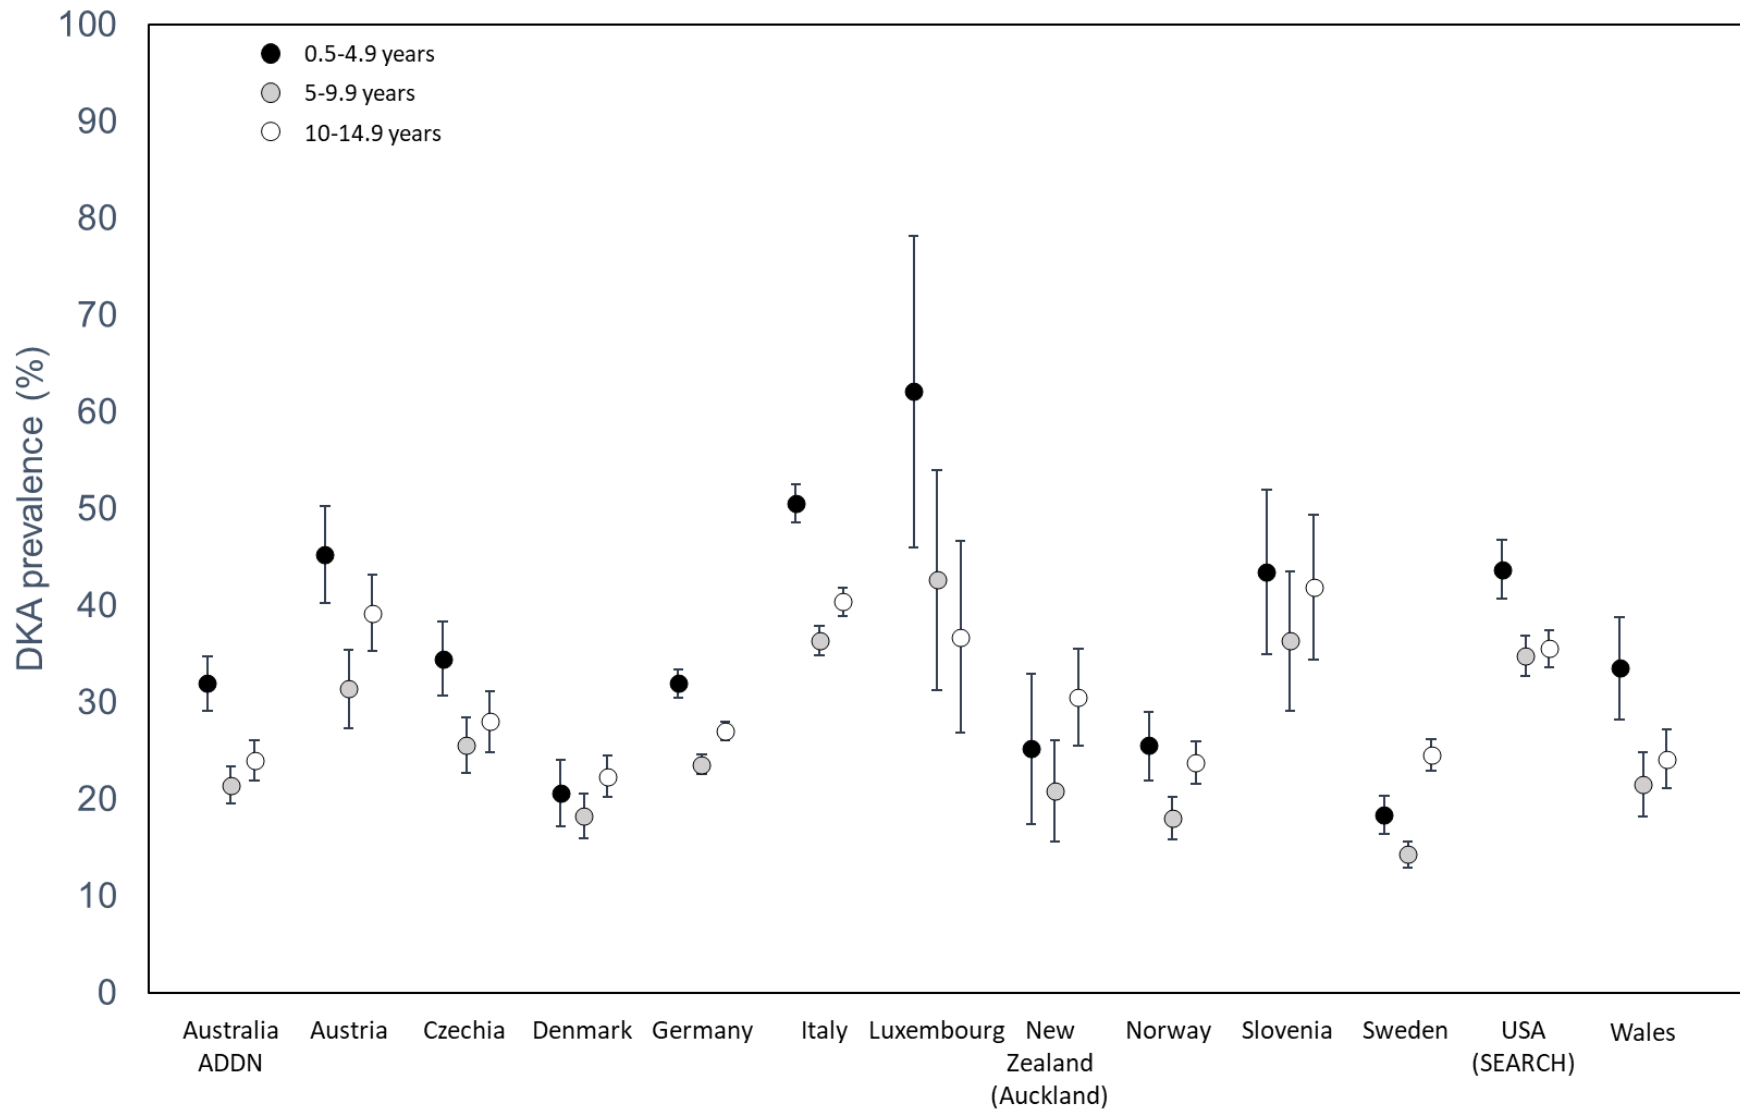

Chi-square test, \*  $p < 0.05$ ; \*\*  $p \leq 0.001$

**ESM Figure 2. Average DKA prevalence (per 100 people) at diagnosis of type 1 diabetes and 95%CI across study populations, according to age groups.**

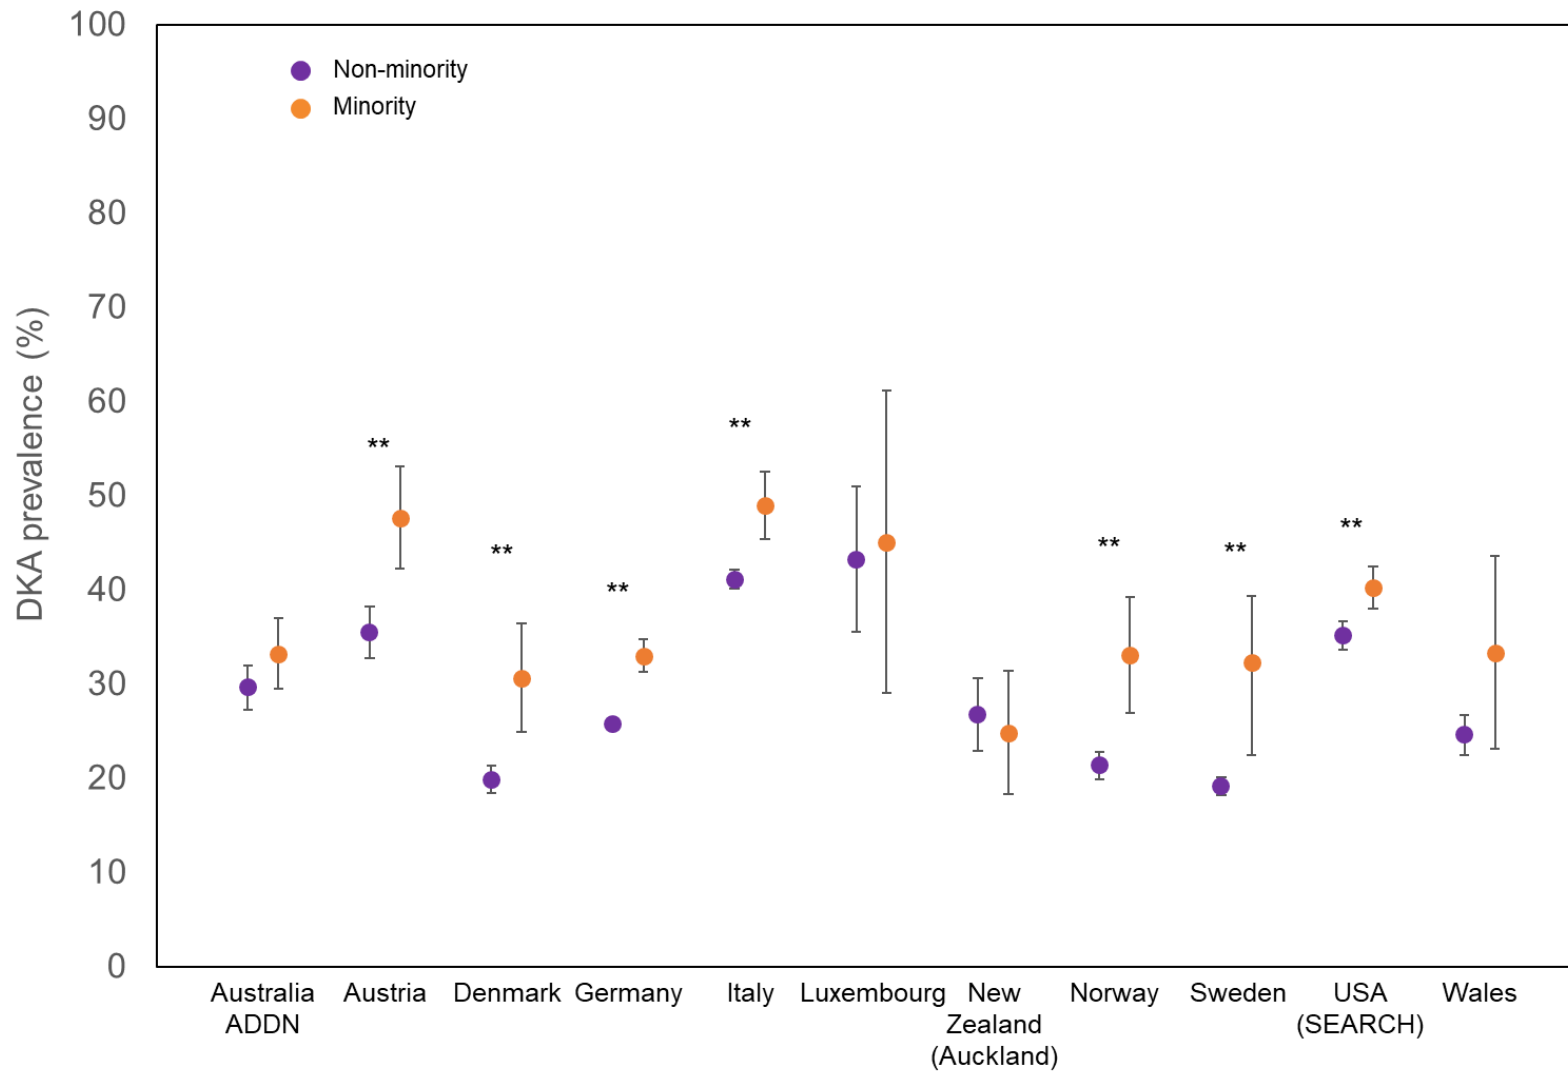

Chi-square test, \*\*  $p < 0.001$

**ESM Figure 3. Average DKA prevalence (per 100 people) at diabetes of type 1 onset and 95%CI across study populations, according to minority status.**

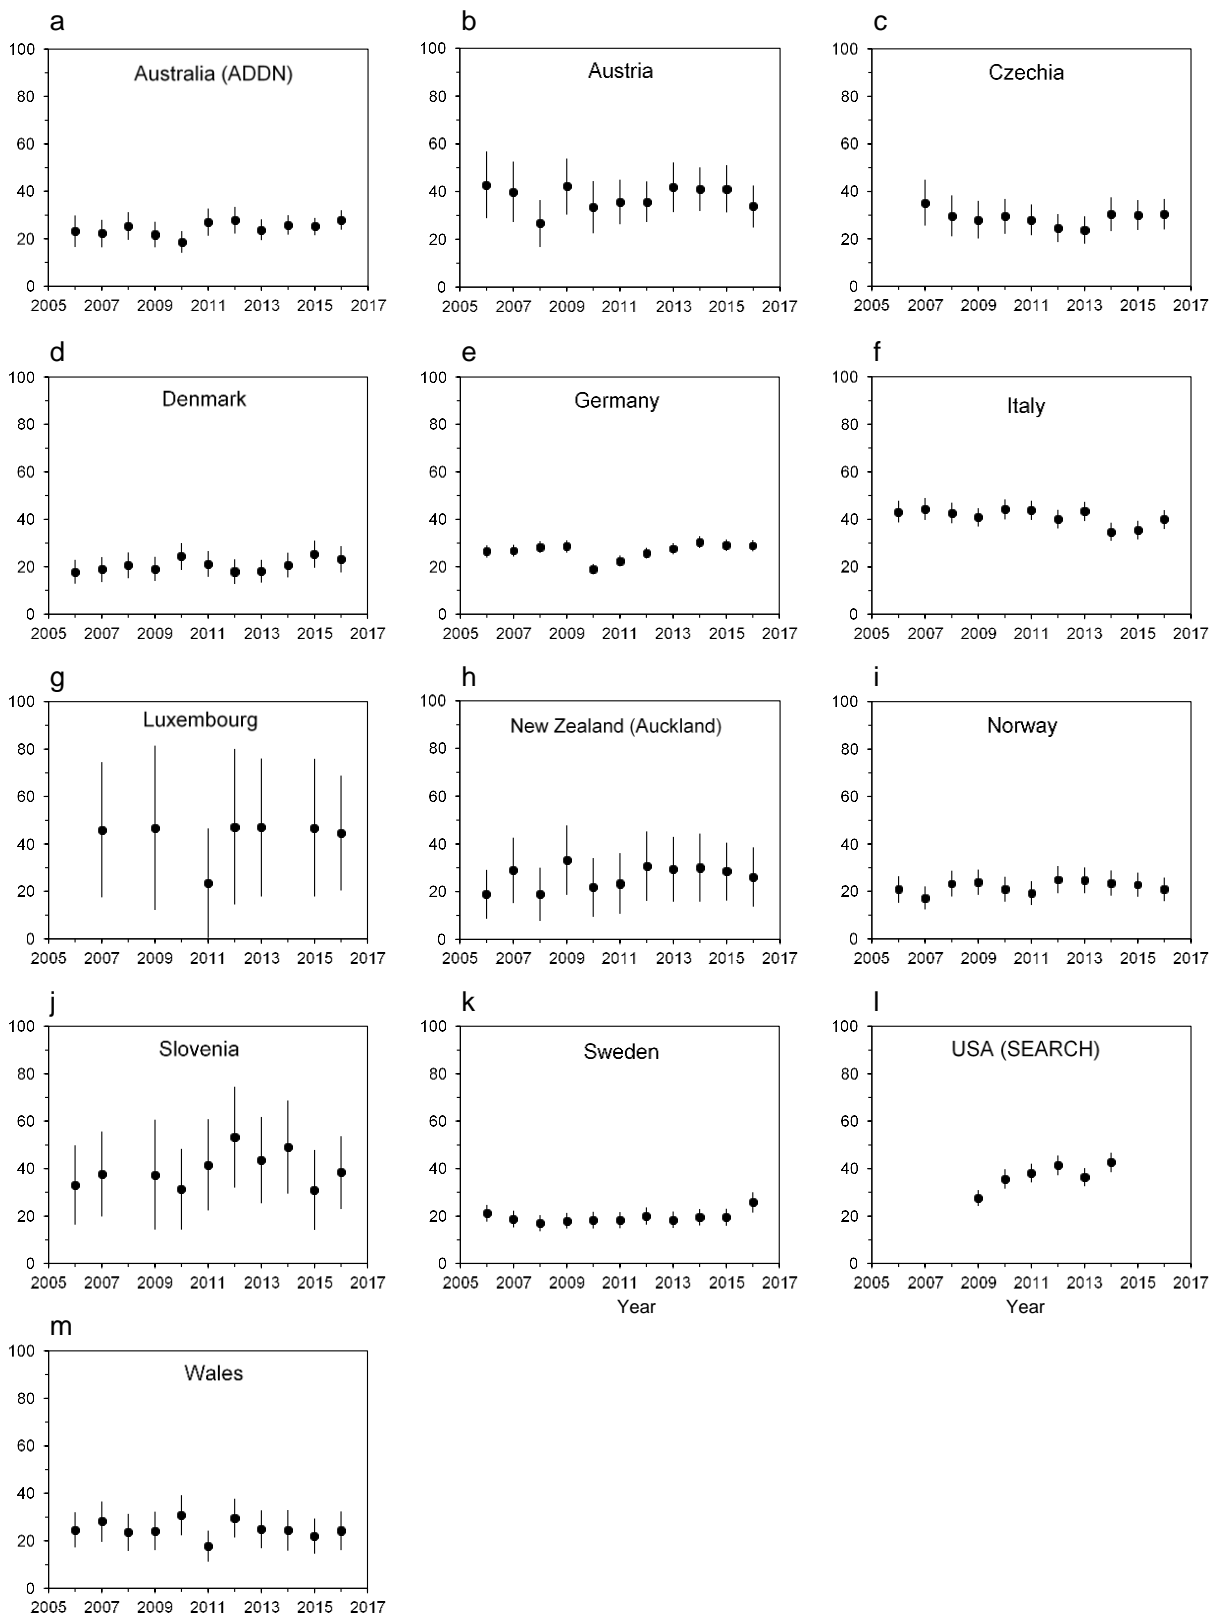

**ESM Figure 4. Prevalence of DKA at diagnosis of type 1 diabetes and 95%CI per country and year adjusted for sex, age-group, and minority status (when available)**  
 DKA prevalence for Czechia and Slovenia adjusted by sex and age-groups

**Panel A**

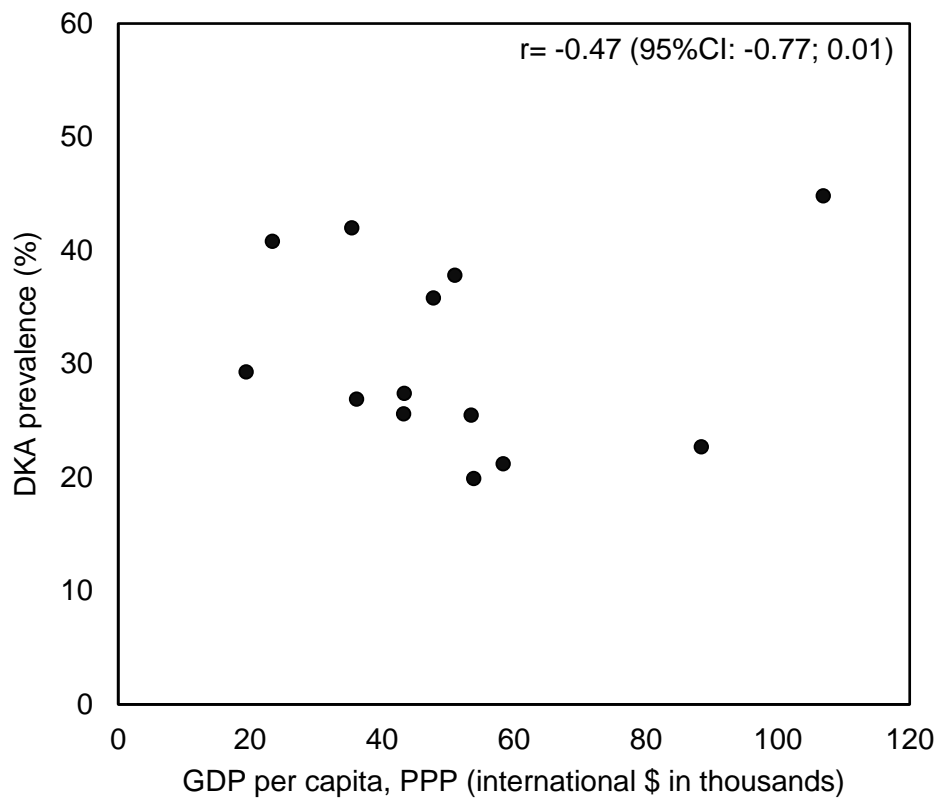

**Panel B**

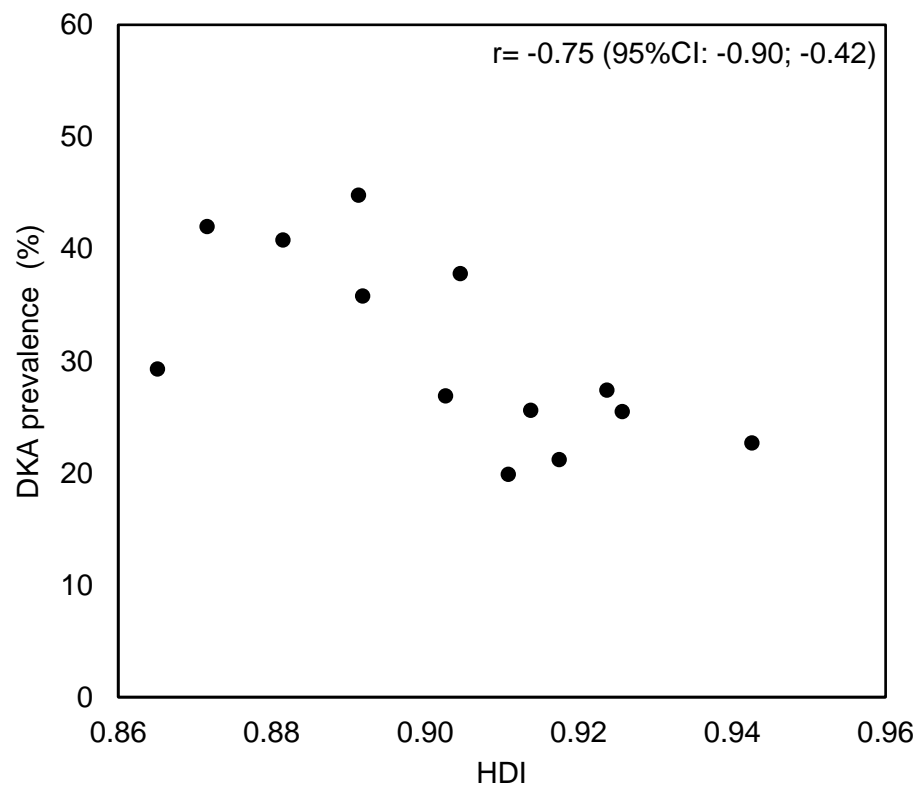



**Panel C**

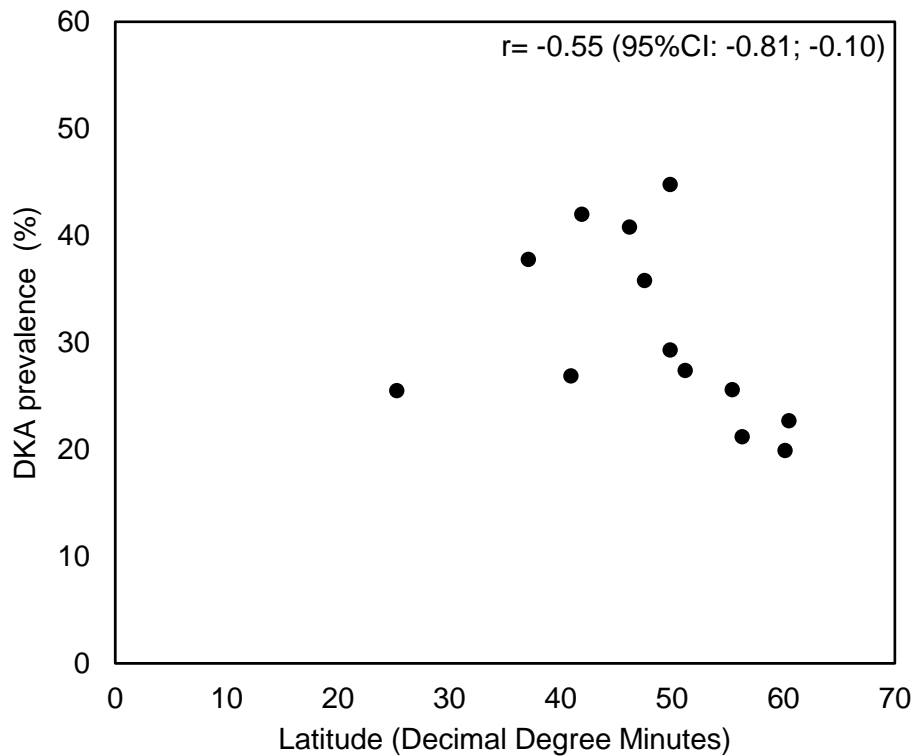

**ESM Figure 5.** Association between average DKA prevalence at diagnosis of type 1 diabetes, adjusted for sex and age-groups, at type 1 diabetes diagnosis (%) and Gross Domestic Product (GDP) per capita, PPP (Purchasing Power Parity, in current international thousand dollars, mean over 2006-2016), Luxembourg outlier. (**panel A**); Latitude, reported as Decimal Degree Minutes of the thirteen participating centres (**panel B**); Human Development Index (HDI, mean over 2006-2016) for the thirteen participating centres (**panel C**). Source GDP per capita, PPP and HDI from Human Development Reports by United Nations Development Programme (<http://hdr.undp.org/en>); source Latitude <https://www.gps-coordinates.net>. r refers to Spearman correlation coefficient and 95% Confidence Interval (95%CI)
